# Supplementary material for: Maternal Protein Restriction in Two Successive Generations Impairs Mitochondrial Electron Coupling in the Progeny’s Brainstem of Wistar Rats From Both Sexes
Source: Front Neurosci. 2019 Mar 14;13:203. doi: 10.3389/fnins.2019.00203 (PMC6427765; doi:10.3389/fnins.2019.00203)
Supplement: Supplementary file 3 [file Table_1.xlsx]

## Sheet: Sheet1
Table 1: Statistic results
		Male				Female
		NP	LP	"p" value	t,df	NP	LP	"p" value	t,df
F1	State 2	6.950 ± 0.8100 N=6	9.651 ± 0.8947 N=7	0.0496	t=2.205 df=11	10.40 ± 0.2500 N=6	9.628 ± 0.7840 N=6	0.3703	t=0.9382 df=10
	State 3	42.40 ± 3.767 N=5	26.18 ± 3.623 N=6	0.013	t=3.087 df=9	27.16 ± 6.674 N=6	28.70 ± 2.144 N=6	0.8305	t=0.2197 df=10
	State 4	3.464 ± 0.4095 N=6	4.220 ± 0.3046 N=6	0.1693	t=1.481 df=10	4.962 ± 0.6408 N=6	4.970 ± 0.4488 N=6	0.992	t=0.01023 df=10
	State uncoupled	46.70 ± 3.062 N=5	42.56 ± 4.774 N=5	0.4862	t=0.7300 df=8	12.62 ± 1.577 N=4	13.27 ± 2.368 N=4	0.8269	t=0.2285 df=6
	RCR	6.816 ± 0.6205 N=5	3.131 ± 0.6844 N=5	0.004	t=3.990 df=8	6.552 ± 0.3795 N=6	5.845 ± 0.2861 N=6	0.1677	t=1.488 df=10
	RS	100.0 ± 10.21 N=5	189.8 ± 22.48 N=5	0.0066	t=3.635 df=8	100.0 ± 7.862 N=6	75.64 ± 13.63 N=6	0.1525	t=1.549 df=10
	MDA	100.0 ± 4.326 N=5	146.9 ± 7.618 N=5	0.0007	t=5.349 df=8	100.0 ± 9.410 N=6	113.3 ± 8.512 N=5	0.3319	t=1.026 df=9
	Carbonyl	100.0 ± 9.726 N=6	190.6 ± 33.42 N=6	0.0264	t=2.603 df=10	100.0 ± 5.097 N=5	76.06 ± 1.992 N=5	0.0024	t=4.375 df=8
	SOD	100.0 ± 10.30 N=6	125.8 ± 15.04 N=5	0.1794	t=1.456 df=9	100.0 ± 7.105 N=6	92.05 ± 5.969 N=6	0.4116	t=0.8568 df=10
	CAT	100.0 ± 9.003 N=6	61.77 ± 7.298 N=6	0.008	t=3.299 df=10	100.0 ± 7.688 N=6	59.28 ± 1.905 N=6	0.0004	t=5.140 df=10
	GST	100.0 ± 10.66 N=5	47.37 ± 4.012 N=5	0.0017	t=4.622 df=8	100.0 ± 7.366 N=5	64.84 ± 5.042 N=5	0.0043	t=3.939 df=8
	Redox state	7.017 ± 0.3031 N=6	5.268 ± 0.5916 N=6	0.0251	t=2.632 df=10	9.238 ± 0.3583 N=6	7.091 ± 0.5629 N=6	0.0092	t=3.218 df=10
F2	State 2	4.092 ± 0.3098 N=6	4.858 ± 0.5398 N=6	0.2466	t=1.231 df=10	8.333 ± 0.2990 N=4	24.90 ± 1.355 N=4	< 0.0001	t=11.94 df=6
	State 3	45.70 ± 1.508 N=5	55.50 ± 7.209 N=5	0.22	t=1.331 df=8	50.80 ± 1.423 N=4	64.55 ± 1.437 N=4	0.0005	t=6.799 df=6
	State 4	4.749 ± 0.1568 N=7	25.80 ± 3.307 N=7	< 0.0001	t=6.358 df=12	6.255 ± 0.5618 N=6	5.332 ± 0.4867 N=5	0.2559	t=1.213 df=9
	State uncoupled	19.29 ± 0.8430 N=5	38.26 ± 2.784 N=5	0.0002	t=6.522 df=8	23.26 ± 1.606 N=5	34.56 ± 3.066 N=6	0.0135	t=3.065 df=9
	RCR	11,26 ± 0,6476 N=7	9,131 ± 0,5701 N=7	0.0294	t=2,472 df=12	7.776 ± 0.7246 N=5	3.753 ± 0.3351 N=5	0.001	t=5.039 df=8
	RS	100.0 ± 8.177 N=5	93.62 ± 8.320 N=5	0.5994	t=0.5468 df=8	100.0 ± 5.260 N=6	77.49 ± 7.269 N=5	0.0303	t=2.567 df=9
	MDA	100.0 ± 6.564 N=6	86.86 ± 15.94 N=6	0.4635	t=0.7623 df=10	100.0 ± 4.625 N=5	90.04 ± 3.163 N=5	0.1134	t=1.777 df=8
	Carbonyl	100.0 ± 2.422 N=6	88.47 ± 13.25 N=4	0.3213	t=1.057 df=8	100.0 ± 9.065 N=5	72.10 ± 3.269 N=5	0.02	t=2.895 df=8
	SOD	100.0 ± 6.564 N=6	76.32 ± 2.517 N=6	0.0071	t=3.369 df=10	100.0 ± 9.065 N=5	64.72 ± 8.070 N=5	0.0197	t=2.906 df=8
	CAT	100.0 ± 5.888 N=6	127.4 ± 16.94 N=6	0.1574	t=1.528 df=10	106.9 ± 6.476 N=4	93.48 ± 2.957 N=4	0.1078	t=1.889 df=6
	GST	100.0 ± 4.940 N=6	90.25 ± 10.84 N=6	0.4319	t=0.8189 df=10	100.0 ± 13.03 N=4	145.0 ± 8.798 N=4	0.0288	t=2.860 df=6
	Redox state	6.173 ± 0.05890 N=4	8.770 ± 0.1648 N=4	< 0.0001	t=14.84 df=6	6.310 ± 0.6363 N=5	10.84 ± 1.268 N=4	0.0112	t=3.416 df=7
F2R	State 2	5.184 ± 0.5169 N=6	8.011 ± 0.6577 N=6	0.007	t=3.380 df=10	3.950 ± 0.3290 N=6	3.938 ± 0.4956 N=6	0.9843	t=0.02017 df=10
	State 3	40.64 ± 2.523 N=5	31.16 ± 3.004 N=5	0.0421	t=2.417 df=8	24.40 ± 1.614 N=6	17.65 ± 0.9740 N=6	0.005	t=3.581 df=10
	State 4	29.59 ± 1.990 N=4	22.26 ± 2.746 N=5	0.0792	t=2.053 df=7	7.699 ± 0.2636 N=6	4.610 ± 0.5172 N=6	0.0003	t=5.321 df=10
	State uncoupled	27.56 ± 1.573 N=5	25.02 ± 2.637 N=5	0.4321	t=0.8272 df=8	27.22 ± 1.051 N=6	15.49 ± 1.592 N=6	0.0001	t=6.149 df=10
	RCR	8.016 ± 0.5382 N=5	4.278 ± 0.2514 N=5	0.0002	t=6.293 df=8	8.638 ± 0.3931 N=6	3.566 ± 0.2540 N=6	< 0.0001	t=10.84 df=10
	RS	100.0 ± 14.05 N=5	285.5 ± 22.93 N=5	0.0001	t=6.900 df=8	100.0 ± 6.642 N=5	239.9 ± 37.42 N=4	0.0043	t=4.148 df=7
	MDA	100.0 ± 12.50 N=6	106.6 ± 15.47 N=4	0.7469	t=0.3341 df=8	100.0 ± 13.84 N=5	173.8 ± 16.21 N=5	0.0085	t=3.462 df=8
	Carbonyl	100.0 ± 4.204 N=4	98.88 ± 5.729 N=4	0.8796	t=0.1580 df=6	100.0 ± 9.159 N=5	73.38 ± 9.547 N=5	0.079	t=2.012 df=8
	SOD	100.0 ± 18.19 N=5	84.39 ± 11.07 N=6	0.4655	t=0.7622 df=9	100.0 ± 9.015 N=5	104.0 ± 9.135 N=5	0.7623	t=0.3130 df=8
	CAT	100.0 ± 5.352 N=5	68.58 ± 6.964 N=6	0.0072	t=3.457 df=9	100.0 ± 6.240 N=4	64.52 ± 17.42 N=4	0.1036	t=1.918 df=6
	GST	100.0 ± 15.87 N=4	85.26 ± 16.51 N=4	0.5435	t=0.6438 df=6	100.0 ± 12.58 N=4	148.2 ± 8.094 N=5	0.0122	t=3.355 df=7
	Redox state	3.300 ± 0.1140 N=6	2.986 ± 0.2120 N=6	0.2218	t=1.303 df=10	3.750 ± 0.1505 N=6	3.544 ± 0.1328 N=6	0.3293	t=1.025 df=10
